# Supplementary material
Source: PubMed Central journal article supplement (PMC9537351)

## Supplementary Online Content

Supplement to: Campbell MS, Bastarache LA, et al. PheWAS Analysis of Perinatal Exposures Associates with Bronchopulmonary Dysplasia in Preterm Infants

**eTable 1.** Missing Data from 20 Variables in NICU Registry and 5 Variables in Base Model

**eTable 2.** List of phenotypes used in PheWAS analysis

**eTable 3.** Data dictionary of the variables included in the database

**eTable 4.** Sensitivity analysis: Base model with maternal diabetes

**eTable 5.** Sensitivity analysis: Base model with congenital malformations

**eTable 6.** Sensitivity analysis: Base model with multiple gestation

**eTable 7.** Comparison of variables used in both PheWAS and logistic regression from the NICU Registry

**eTable 8.** Variables known to be associated with increased BPD risk or protective affect in PheWAS group

**eFigure 1.** Receiver Operating Characteristic (ROC) curve for base model

This appendix has been provided by the authors to give readers additional information about their work.

**eTable 1.** Missing Data from 20 Variables in NICU Registry and 5 Variables in Base Model that was reconciled by manual chart review

| <b>Variable</b>       | <b>Initial Missing (N)</b> | <b>Missing Information</b> | <b>Final Missing (N)</b> |
|-----------------------|----------------------------|----------------------------|--------------------------|
| Mom age               | 14                         | 14                         | 0                        |
| Baby gender           | 3                          | 3                          | 0                        |
| Mom race              | 8                          | 7                          | 1                        |
| Gestational age       | 0                          | 0                          | 0                        |
| Birth year            | 0                          | 0                          | 0                        |
| Birth weight          | 0                          | 0                          | 0                        |
| Multiple gestation    | 0                          | 0                          | 0                        |
| Prenatal care         | 22                         | 0                          | 22                       |
| Vaginal bleeding      | 0                          | 0                          | 0                        |
| Chorioamnionitis      | 3                          | 3                          | 0                        |
| Oligohydramnios       | 0                          | 0                          | 0                        |
| Polyhydramnios        | 0                          | 0                          | 0                        |
| Diabetes              | 0                          | 0                          | 0                        |
| Chronic hypertension  | 0                          | 0                          | 0                        |
| Maternal Illicit drug | 0                          | 0                          | 0                        |
| Antenatal steroids    | 92                         | 7                          | 85                       |
| C-Section             | 0                          | 0                          | 0                        |
| Vertex presentation   | 0                          | 0                          | 0                        |
| Anesthesia            | 51                         | 31                         | 20                       |
| Gestational           | 20                         | 0                          | 20                       |
| Vaginal bleeding      | 2                          | 0                          | 2                        |
| Meconium              | 0                          | 0                          | 0                        |
| Gravida               | 16                         | 9                          | 7                        |

| Variable             | Initial Missing (N) | Missing Information | Final Missing (N) |
|----------------------|---------------------|---------------------|-------------------|
| Reason for Preterm   | 34                  | 0                   | 34                |
| Rupture of membranes | 78                  | 0                   | 78                |

**eTable 2.** List of phenotypes used in PheWAS analysis

| Maternal Phenotype                 | OR   | p-value              | Cases | Controls | FDR                  |
|------------------------------------|------|----------------------|-------|----------|----------------------|
| Polyhydramnios                     | 4.72 | $3.4 \times 10^{-9}$ | 130   | 1831     | $3.2 \times 10^{-7}$ |
| Problems associated with amniotic  | 2.35 | $2.2 \times 10^{-7}$ | 480   | 1481     | $1.0 \times 10^{-5}$ |
| Known or suspected fetal           | 1.94 | $2.5 \times 10^{-5}$ | 1208  | 753      | $7.8 \times 10^{-4}$ |
| Oligohydramnios                    | 1.83 | $7.6 \times 10^{-4}$ | 356   | 1605     | 0.018                |
| Asthma                             | 2.47 | $9.9 \times 10^{-4}$ | 148   | 1813     | 0.019                |
| Poor fetal growth and uterine size | 1.68 | $5.3 \times 10^{-3}$ | 495   | 1466     | 0.084                |
| Placental disorders                | 1.50 | 0.018                | 440   | 1521     | 0.246                |
| Mood [affective] disorders         | 1.72 | 0.026                | 196   | 1765     | 0.309                |
| Abnormalities of gravid uterus     | 0.54 | 0.043                | 131   | 1830     | 0.449                |
| Maternal care for abnormality of   | 0.71 | 0.076                | 338   | 1623     | 0.711                |
| Preeclampsia and eclampsia         | 0.76 | 0.135                | 485   | 1476     | 0.846                |
| Major depressive disorder          | 1.55 | 0.138                | 130   | 1831     | 0.846                |
| Maternal care for breech           | 1.28 | 0.146                | 415   | 1546     | 0.846                |
| Abnormalities of breathing         | 1.52 | 0.152                | 141   | 1820     | 0.846                |
| Malposition and malpresentation of | 1.24 | 0.158                | 654   | 1307     | 0.846                |
| Severe pre-eclampsia or HELLP      | 0.73 | 0.164                | 253   | 1708     | 0.846                |
| Headache                           | 0.72 | 0.166                | 233   | 1728     | 0.846                |
| Hemolytic anemias                  | 0.64 | 0.170                | 145   | 1816     | 0.846                |
| Intrinsic (hereditary) hemolytic   | 0.65 | 0.179                | 144   | 1817     | 0.846                |
| Antepartum hemorrhage              | 1.33 | 0.180                | 240   | 1721     | 0.846                |
| Other conditions or status of the  | 1.21 | 0.195                | 976   | 985      | 0.871                |
| Headache                           | 0.74 | 0.222                | 207   | 1754     | 0.946                |
| Cytology and pathology findings    | 1.35 | 0.244                | 170   | 1791     | 0.946                |

| <b>Maternal Phenotype</b>            | <b>OR</b> | <b>p-value</b> | <b>Cases</b> | <b>Controls</b> | <b>FDR</b> |
|--------------------------------------|-----------|----------------|--------------|-----------------|------------|
| Spotting complicating pregnancy      | 0.67      | 0.252          | 109          | 1852            | 0.946      |
| Anemia                               | 0.82      | 0.261          | 447          | 1514            | 0.946      |
| Premature rupture of membranes       | 1.21      | 0.268          | 432          | 1529            | 0.946      |
| Abdominal pain                       | 0.81      | 0.278          | 431          | 1530            | 0.946      |
| Premature separation of placenta     | 1.28      | 0.291          | 183          | 1778            | 0.946      |
| Substance dependence                 | 1.33      | 0.321          | 119          | 1842            | 0.946      |
| False labor                          | 0.78      | 0.326          | 214          | 1747            | 0.946      |
| Abnormality in fetal heart rate or   | 1.16      | 0.333          | 724          | 1237            | 0.946      |
| Umbilical cord complications         | 1.25      | 0.342          | 185          | 1776            | 0.946      |
| Mental disorders complicating        | 1.21      | 0.343          | 311          | 1650            | 0.946      |
| Substance abuse, dependence, and     | 1.27      | 0.352          | 151          | 1810            | 0.946      |
| Endocrine, nutritional and metabolic | 0.78      | 0.367          | 145          | 1816            | 0.946      |
| Infection of amniotic cavity         | 0.84      | 0.382          | 296          | 1665            | 0.946      |
| Preterm labor (including history of) | 0.87      | 0.392          | 1269         | 692             | 0.946      |
| Dyspnea                              | 1.31      | 0.406          | 104          | 1857            | 0.946      |
| Tachycardia                          | 1.27      | 0.419          | 126          | 1835            | 0.946      |
| Tobacco use during pregnancy         | 1.18      | 0.420          | 283          | 1678            | 0.946      |
| Tobacco use                          | 1.17      | 0.422          | 327          | 1634            | 0.946      |
| Anemia secondary to chronic          | 0.86      | 0.443          | 293          | 1668            | 0.946      |
| Anemia in pregnancy                  | 0.86      | 0.443          | 293          | 1668            | 0.946      |
| Morbid obesity                       | 1.17      | 0.490          | 237          | 1724            | 0.946      |
| Type 2 diabetes                      | 1.24      | 0.491          | 127          | 1834            | 0.946      |
| Other behavioral problems            | 1.14      | 0.492          | 353          | 1608            | 0.946      |
| Diabetes mellitus                    | 1.13      | 0.521          | 400          | 1561            | 0.946      |
| Delayed delivery after spontaneous   | 1.13      | 0.527          | 400          | 1561            | 0.946      |
| Nausea                               | 0.83      | 0.532          | 163          | 1798            | 0.946      |
| Hypothyroidism                       | 0.83      | 0.540          | 115          | 1846            | 0.946      |
| Drugs and alcohol during pregnancy   | 1.12      | 0.552          | 318          | 1643            | 0.946      |
| Infections of genitourinary tract in | 1.14      | 0.568          | 264          | 1697            | 0.946      |

| <b>Maternal Phenotype</b>           | <b>OR</b> | <b>p-value</b> | <b>Cases</b> | <b>Controls</b> | <b>FDR</b> |
|-------------------------------------|-----------|----------------|--------------|-----------------|------------|
| Nausea and vomiting                 | 0.85      | 0.568          | 170          | 1791            | 0.946      |
| Substance related disorders         | 1.17      | 0.580          | 114          | 1847            | 0.946      |
| Threatened abortion                 | 0.88      | 0.591          | 200          | 1761            | 0.946      |
| Hypertension                        | 1.11      | 0.607          | 330          | 1631            | 0.946      |
| Chest pain                          | 1.17      | 0.618          | 111          | 1850            | 0.946      |
| Pre-existing hypertension           | 1.10      | 0.632          | 371          | 1590            | 0.946      |
| Diabetes mellitus in pregnancy,     | 1.09      | 0.635          | 401          | 1560            | 0.946      |
| Other viral infections              | 0.85      | 0.637          | 104          | 1857            | 0.946      |
| Acute posthemorrhagic anemia        | 0.87      | 0.641          | 101          | 1860            | 0.946      |
| Complications of labor and delivery | 0.88      | 0.651          | 136          | 1825            | 0.946      |
| Other symptoms/disorders or the     | 0.88      | 0.654          | 144          | 1817            | 0.946      |
| Bleeding in pregnancy               | 1.07      | 0.676          | 480          | 1481            | 0.946      |
| Disorders of thyroid gland          | 1.11      | 0.687          | 149          | 1812            | 0.946      |
| Vomiting                            | 0.87      | 0.697          | 122          | 1839            | 0.946      |
| Obesity                             | 1.07      | 0.698          | 599          | 1362            | 0.946      |
| Edema, proteinuria and              | 0.94      | 0.705          | 685          | 1276            | 0.946      |
| Disorders of menstruation and other | 1.12      | 0.723          | 112          | 1849            | 0.946      |
| Obesity or excessive weight gain in | 1.06      | 0.724          | 595          | 1366            | 0.946      |
| Viral diseases complicating         | 1.12      | 0.737          | 100          | 1861            | 0.946      |
| Cervical shortening and             | 0.94      | 0.760          | 257          | 1704            | 0.946      |
| Inflammatory diseases of female     | 1.07      | 0.782          | 197          | 1764            | 0.946      |
| Essential hypertension              | 1.06      | 0.793          | 300          | 1661            | 0.946      |
| Cardiac arrhythmia                  | 1.06      | 0.794          | 206          | 1755            | 0.946      |
| Reaction to severe stress, and      | 1.08      | 0.797          | 111          | 1850            | 0.946      |
| Back pain                           | 0.92      | 0.805          | 136          | 1825            | 0.946      |
| Hemorrhage in early pregnancy       | 0.95      | 0.806          | 302          | 1659            | 0.946      |
| Inflammatory disease of cervix,     | 0.94      | 0.821          | 144          | 1817            | 0.946      |
| Vaginitis and vulvovaginitis        | 0.94      | 0.823          | 127          | 1834            | 0.946      |
| Infections and carrier state in     | 0.97      | 0.826          | 683          | 1278            | 0.946      |

| <b>Maternal Phenotype</b>        | <b>OR</b> | <b>p-value</b> | <b>Cases</b> | <b>Controls</b> | <b>FDR</b> |
|----------------------------------|-----------|----------------|--------------|-----------------|------------|
| Abnormal forces of labor         | 1.04      | 0.835          | 460          | 1501            | 0.946      |
| Gastro-esophageal reflux disease | 1.07      | 0.836          | 121          | 1840            | 0.946      |
| Dysuria                          | 0.94      | 0.864          | 105          | 1856            | 0.963      |
| Overweight and obesity           | 1.02      | 0.890          | 625          | 1336            | 0.963      |
| Excessive vomiting in pregnancy  | 0.97      | 0.894          | 224          | 1737            | 0.963      |
| Abnormal glucose complicating    | 0.97      | 0.911          | 273          | 1688            | 0.963      |
| Decreased fetal movements,       | 0.97      | 0.916          | 179          | 1782            | 0.963      |
| Placenta previa                  | 1.03      | 0.917          | 143          | 1818            | 0.963      |
| Anxiety disorders                | 1.03      | 0.922          | 123          | 1838            | 0.963      |
| Urinary tract infection          | 0.99      | 0.955          | 213          | 1748            | 0.972      |
| Abnormal glucose tolerance in    | 0.99      | 0.957          | 299          | 1662            | 0.972      |
| Gestational (pregnancy-induced)  | 0.99      | 0.964          | 233          | 1728            | 0.972      |
| Preterm labor                    | 1.01      | 0.972          | 1217         | 744             | 0.972      |

**eTable 3.** Data dictionary of the variables included in the database

| <b>Field Caption</b>           | <b>Explanation</b>                                                                     | <b>Rules</b>                                                                     |
|--------------------------------|----------------------------------------------------------------------------------------|----------------------------------------------------------------------------------|
| Multiple gestation             | Multiple births                                                                        | Range: 0, 1, 9; Codes: 0=No, 1=Yes, 9=Unknown                                    |
| Prenatal Care                  | Prenatal care                                                                          | Range: 0, 1, 9; Codes: 0=No, 1=Yes, 9=Unknown                                    |
| Vaginal Bleeding               | Vaginal bleeding prior to delivery                                                     | Range: 0, 1; Codes: 0=No, 1=Yes                                                  |
| Chorioamnionitis               | Maternal infection diagnosed clinically prior to delivery                              | Range: 0, 1; Codes: 0=No, 1=Yes                                                  |
| Oligohydramnios                | Oligohydramnios diagnosed by ultrasound criteria                                       | Range: 0, 1; Codes: 0=No, 1=Yes                                                  |
| Polyhydramnios                 | Polyhydramnios diagnosed by ultrasound criteria                                        | Range: 0, 1; Codes: 0=No, 1=Yes                                                  |
| Diabetes (all types)           | Included gestational diabetes, type 1 diabetes and type 2 diabetes                     | Range: 0, 1; Codes: 0=No, 1=Yes                                                  |
| Chronic Hypertension           | Maternal chronic hypertension                                                          | Range: 0, 1; Codes: 0=No, 1=Yes                                                  |
| Maternal Drug Use              | Maternal substance abuse                                                               | Range: 0, 1; Codes: 0=No, 1=Yes                                                  |
| Antenatal Steroids             | Antenatal steroids                                                                     | Range: 0, 1, 9; Codes: 0=No, 1=Yes, 9=Unknown                                    |
| Mode of delivery               | Delivery type                                                                          | Range: 0, 1, 9; Codes: 0=C-section, 1=Vaginal, 9=Unknown                         |
| Vertex Presentation            | Vertex presentation                                                                    | Range: 0, 1; Codes: 0=No, 1=Yes                                                  |
| Anesthesia used in labor       | Included use of epidural, spinal anesthesia, regional anesthesia or general anesthesia | Range: 0, 1, 2, 3, 4; Codes: 0=None, 1=Epidural, 2=Spinal, 3=Regional, 4=General |
| Pregnancy induced hypertension | Included pre-eclampsia, HELLP and eclampsia                                            | Range: 0, 1, 2, 3; Codes: 0=No, 1=Pre-eclampsia, 2=HELLP, 3=Eclampsia            |
| Vaginal bleeding type          | Reason for bleeding                                                                    | Range: 1, 2, ; Codes: 1=Unknown origin, 2= Abruption, 3=Placenta previa          |
| Meconium                       | Meconium stained amniotic fluid present at the time of delivery                        | Range: 0, 1; Codes: 0=No, 1=Yes                                                  |
| Mom Age                        | Mother's age at the time of delivery                                                   | Range: Minimum 12, Maximum 50                                                    |
| Gravida                        | Number of previous pregnancies                                                         | Range: Minimum 1, Maximum 20                                                     |

| Field Caption            | Explanation                                                                                                                                                                                                                                             | Rules                                                                                                                                                                                                                                                                                                                |
|--------------------------|---------------------------------------------------------------------------------------------------------------------------------------------------------------------------------------------------------------------------------------------------------|----------------------------------------------------------------------------------------------------------------------------------------------------------------------------------------------------------------------------------------------------------------------------------------------------------------------|
| Reason for Preterm Labor | Included premature labor, preterm premature rupture of membranes, pregnancy induced hypertension, multiple gestation, chorioamnionitis, abruption, incompetent cervix, trauma, maternal diabetes, and medically indicated for maternal or infant health | Range 1,2,3,4,5,6,7,8,9,10, 99:<br>Code 1=Premature Labor, 2=Preterm Premature Rupture of Membranes, 3=Pregnancy Induced Hypertension, 4=Multiple Gestation, 5=Chorioamionintis, 6=Abruption, 7=Incompetent Cervix, 8=Trauma, 9=Maternal Diabetes, 10= Medically Indicated for Maternal or Infant Health, 99=Unknown |
| Rupture of membranes     | Number of days the membranes were ruptured prior to delivery                                                                                                                                                                                            | Range: Minimum 0, Maximum 270 days                                                                                                                                                                                                                                                                                   |



**eTable 4.** Sensitivity analysis: Base model with maternal diabetes

| <b>Pregnancy Exposures and Complications</b> | <b>BPD (%)</b> | <b>Controls (%)</b> | <b>a*OR</b> | <b>95% CI</b> | <b>p-value</b> |
|----------------------------------------------|----------------|---------------------|-------------|---------------|----------------|
| Polyhydramnios, N (%)                        | 23 (2%)        | 40 (1%)             | 5.66        | 2.75-11.64    | <0.001         |

a\*OR controlling for diabetes in addition to variables in our base model

**eTable 5.** Sensitivity analysis: Base model with congenital malformations

| <b>Pregnancy Exposures and Complications</b> | <b>BPD (%)</b> | <b>Controls (%)</b> | <b>a*OR</b> | <b>95% CI</b> | <b>p-value</b> |
|----------------------------------------------|----------------|---------------------|-------------|---------------|----------------|
| Polyhydramnios, N (%)                        | 23 (2%)        | 40 (1%)             | 4.01        | 1.93-8.33     | <0.001         |

a\*OR controlling for congenital malformations in addition to variables in our base model

**eTable 6.** Sensitivity analysis: Base model with multiple gestation

| <b>Pregnancy Exposures and Complications</b> | <b>BPD (%)</b> | <b>Controls (%)</b> | <b>a*OR</b> | <b>Robust Std. Err.</b> | <b>95% CI</b> | <b>p-value</b> |
|----------------------------------------------|----------------|---------------------|-------------|-------------------------|---------------|----------------|
| Polyhydramnios, N (%)                        | 23 (2%)        | 40 (1%)             | 5.58        | 2.36                    | 2.44-12.77    | <0.001         |

a\*OR controlling for multiple gestation in addition to variables in our base model

**eTable 7.** Comparison of variables used in both PheWAS and logistic regression from the NICU Registry

| Variables                          | PheWAS |          |        |                        |                        |                        | NICU Registry |      |              |                        |
|------------------------------------|--------|----------|--------|------------------------|------------------------|------------------------|---------------|------|--------------|------------------------|
|                                    | Cases  | Controls | OR     | p-value                | FDR                    | Bonferroni             | n             | aOR  | 95% CI       | p-value                |
| Bleeding in pregnancy              | 480    | 1481     | 1.0729 | 0.676                  | 0.946                  | 1                      | 754           | 1.04 | 0.81-1.34    | 0.73                   |
| Premature separation of placenta   | 183    | 1778     | 1.2769 | 0.291                  | 0.946                  | 1                      | 489           | 1.14 | 0.85 - 1.52  | 0.38                   |
| Preeclampsia and eclampsia         | 485    | 1476     | 0.7629 | 0.135                  | 0.846                  | 1                      | 1136          | 1.07 | 0.85 - 1.34  | 0.59                   |
| Polyhydramnios                     | 130    | 1831     | 4.7164 | 3.4 x 10 <sup>-9</sup> | 3.2 x 10 <sup>-7</sup> | 3.2 x 10 <sup>-7</sup> | 63            | 5.70 | 2.78 - 11.44 | 1.4 x 10 <sup>-6</sup> |
| Oligohydramnios                    | 356    | 1605     | 1.8325 | 7.6 x 10 <sup>-4</sup> | 0.018                  | 0.072                  | 198           | 2.19 | 1.42 - 3.34  | 3.3 x 10 <sup>-4</sup> |
| Drugs and alcohol during pregnancy | 318    | 1643     | 1.1219 | 0.552                  | 0.946                  | 1                      | 1189          | 0.85 | 0.68 - 1.05  | 0.123                  |

**eTable 8.** Variables known to be associated with increased BPD risk or protective affect in PheWAS group

|                                          | All subjects (N=1961) | with BPD (N=531)      | without BPD (N=1430)  |
|------------------------------------------|-----------------------|-----------------------|-----------------------|
| Birthweight<br>Mean (range) <sup>a</sup> | 1546g (340-3960g)     | 1033g (340-3005g)     | 1737g (560-3960)      |
| Gestational age                          | 30 weeks (22-33weeks) | 27 weeks (22-33weeks) | 31 weeks (25-33weeks) |

|                                      |                                                                                                                                                         |                                                                                                                                                      |                                                                                                                                                        |
|--------------------------------------|---------------------------------------------------------------------------------------------------------------------------------------------------------|------------------------------------------------------------------------------------------------------------------------------------------------------|--------------------------------------------------------------------------------------------------------------------------------------------------------|
| Mean (range) <sup>b</sup>            |                                                                                                                                                         |                                                                                                                                                      |                                                                                                                                                        |
| Sex                                  | Male: 1069 (54.5%)<br>Female: 892 (45.5%)                                                                                                               | Male: 301 (56.7%)<br>Female: 230 (43.3%)                                                                                                             | Male: 768 (53.7%)<br>Female: 662 (46.3%)                                                                                                               |
| Birth year (range)                   | 2012<br>(2005-2017)                                                                                                                                     | 2012<br>(2005-2017)                                                                                                                                  | 2012<br>(2006-2017)                                                                                                                                    |
| Maternal race/ethnicity <sup>c</sup> | White, non-Hispanic<br>1133 (57.8%)<br><br>African-American<br>457 (23.3%)<br><br>Hispanic<br>200 (10.2%)<br>Other<br>92 (4.7%)<br>Unknown<br>79 (4.0%) | White, non-Hispanic<br>306 (57.6%)<br><br>African-American<br>122 (23.0%)<br><br>Hispanic<br>51 (9.6%)<br>Other<br>32 (6.0%)<br>Unknown<br>20 (3.8%) | White, non-Hispanic<br>827 (57.8%)<br><br>African-American<br>335 (23.4%)<br><br>Hispanic<br>149 (10.4%)<br>Other<br>60 (4.2%)<br>Unknown<br>59 (4.1%) |

**eFigure 1.** Receiver Operating Characteristic (ROC) curve for base model

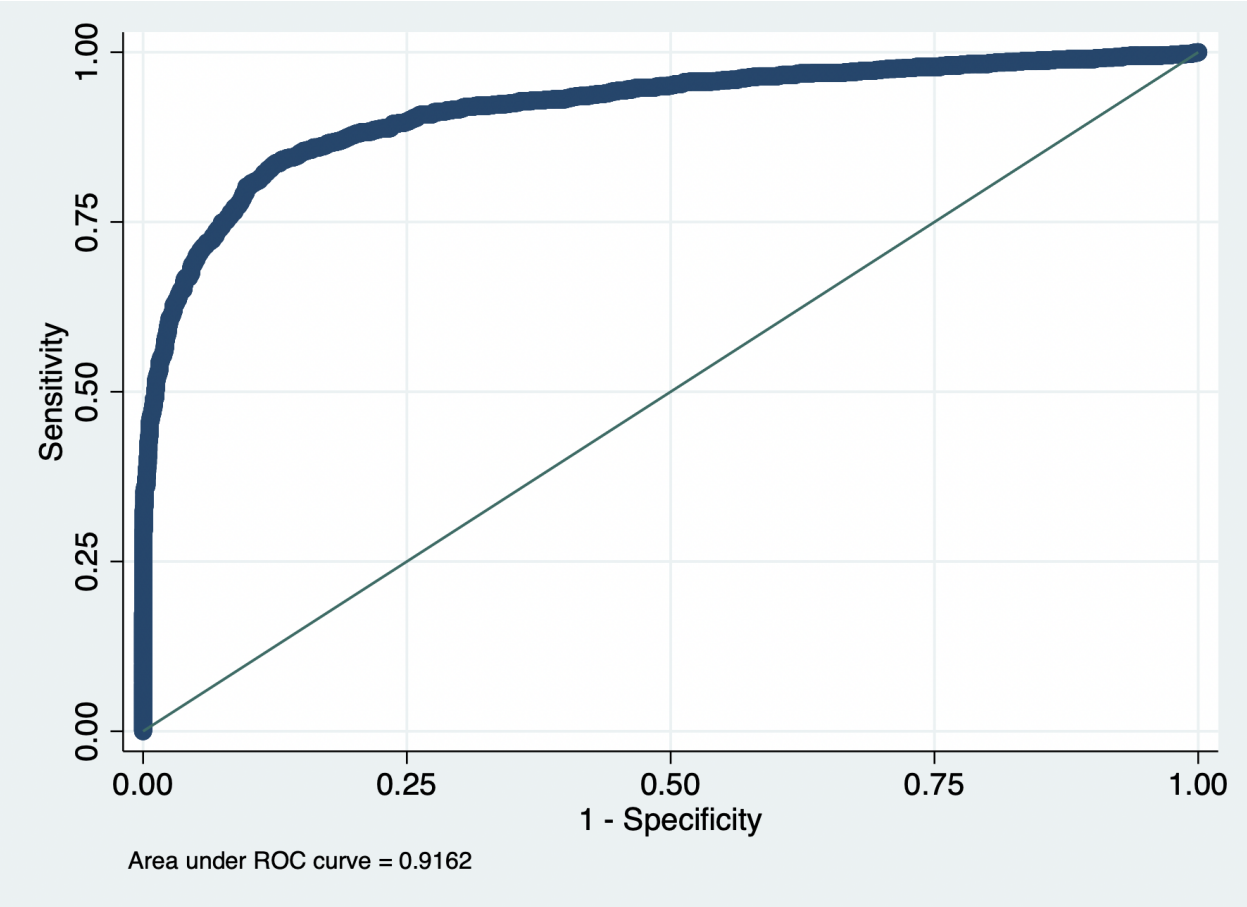

Supplement: NIHMS1791812-supplement-1791812_Sup_material.pdf [file NIHMS1791812-supplement-1791812_Sup_material.pdf]
